# Supplementary material for: Controlling the Structural Robustness of Zirconium-Based Metal Organic Frameworks for Efficient Adsorption on Tetracycline Antibiotics
Source: MDPI journal article supplement (doi:10.3390/w13131869), 2021-07-05
Supplement: s1 [file s1]

## Article

# Controlling the Structural Robustness of Zirconium-Based Metal Organic Frameworks for Efficient Adsorption on Tetracycline Antibiotics

Hee-Gon Kim <sup>1,2,†</sup>, Keunsu Choi <sup>3,†</sup>, Kibong Lee <sup>2</sup>, Soonjae Lee <sup>4</sup>, Kyung-Won Jung <sup>1,\*</sup> and Jae-Woo Choi <sup>1,5,\*</sup>
<sup>1</sup> Water Cycle Research Center, Korea Institute of Science and Technology, Hwarang-ro 14-gil 5, Seongbuk-gu, Seoul 02792, Republic of Korea; 090923@kist.re.kr

<sup>2</sup> Department of Chemical and Biological Engineering, Korea University, Anam-ro 145, Seongbuk-gu, Seoul 02841, Republic of Korea; kibonglee@korea.ac.kr

<sup>3</sup> Department of Physics, Ulsan National Institute of Science and Technology, UNIST-gil 50, Ulju-gun, Ulsan 44919, Republic of Korea; c.keunsu@gmail.com

<sup>4</sup> Department of Earth and Environmental Sciences, Korea University, Anam-ro 145, Seongbuk-gu, Seoul 02841, Republic of Korea; soonjam@korea.ac.kr

<sup>5</sup> Division of Energy & Environment Technology, KIST school, Korea University of Science and Technology, Hwarang-ro 14-gil 5, Seongbuk-gu, Seoul 02792, Republic of Korea

† These authors contributed equally.

\* Correspondence: kyungwonj@kist.re.kr (K.-W.J.); plead36@kist.re.kr (J.-W.C.)

## Supplementary Material

**Table S1.** Studies for the removal of TCs by adsorption.

| Reference | MOF        | TC initial conc. (mg/L) | MOF dosage (g) | Contact time (min) | Removal capacity |
|-----------|------------|-------------------------|----------------|--------------------|------------------|
| 11        | CoUiO-66   | 50                      | 0.2            | 180                | 71.3%            |
| 2         | ZIF-8      | 50                      | 25             | 120                | 90.7%            |
| 50        | Fe-MIL-101 | 50                      | 2.5            | 60                 | 55.1 mg/g        |
|           | Fe-MIL-53  |                         |                |                    | 10.5%            |
|           | Fe-MIL-100 |                         |                |                    | 44.1%            |
| S1        | ZIF-8      | 50                      | 0.3            | 1440               | 137 mg/g         |
| 29        | UiO-66     | 20                      | 0.3            | 1440               | 12.2 mg/g        |
|           | MnUiO-66   |                         |                |                    | 72.5 mg/g        |

**Table S2.** Profiles of MOFs for experimental synthesis.

| Sample                 | ZrCl <sub>4</sub> (g) | BDC (g) | HCl (mL) | DMF (mL) |
|------------------------|-----------------------|---------|----------|----------|
| UiO-66                 | 0.125                 | 0.134   | 1        | 15       |
| UiO-66-NH <sub>2</sub> | 0.125                 | 0.134   | 1        | 15       |

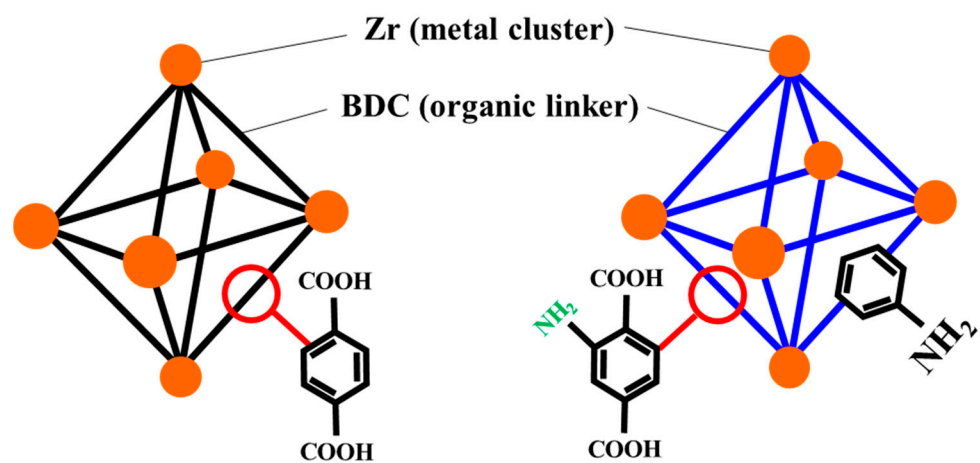

**Figure S1.** Chemical structures of UiO-66 and UiO-66-NH<sub>2</sub>.

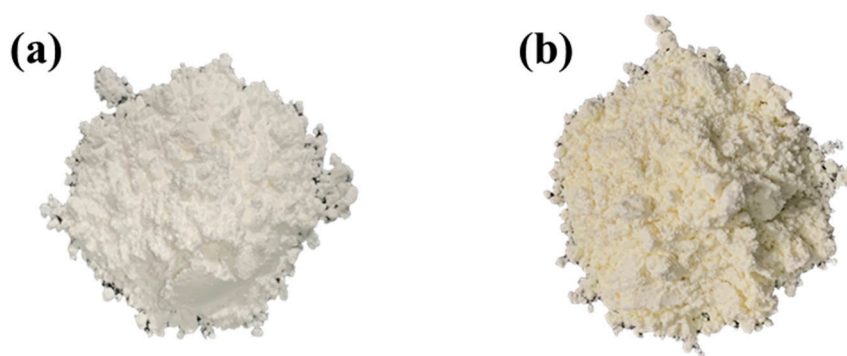

**Figure S2.** Photographs of (a) UiO-66 and (b) UiO-66-NH<sub>2</sub> powders.

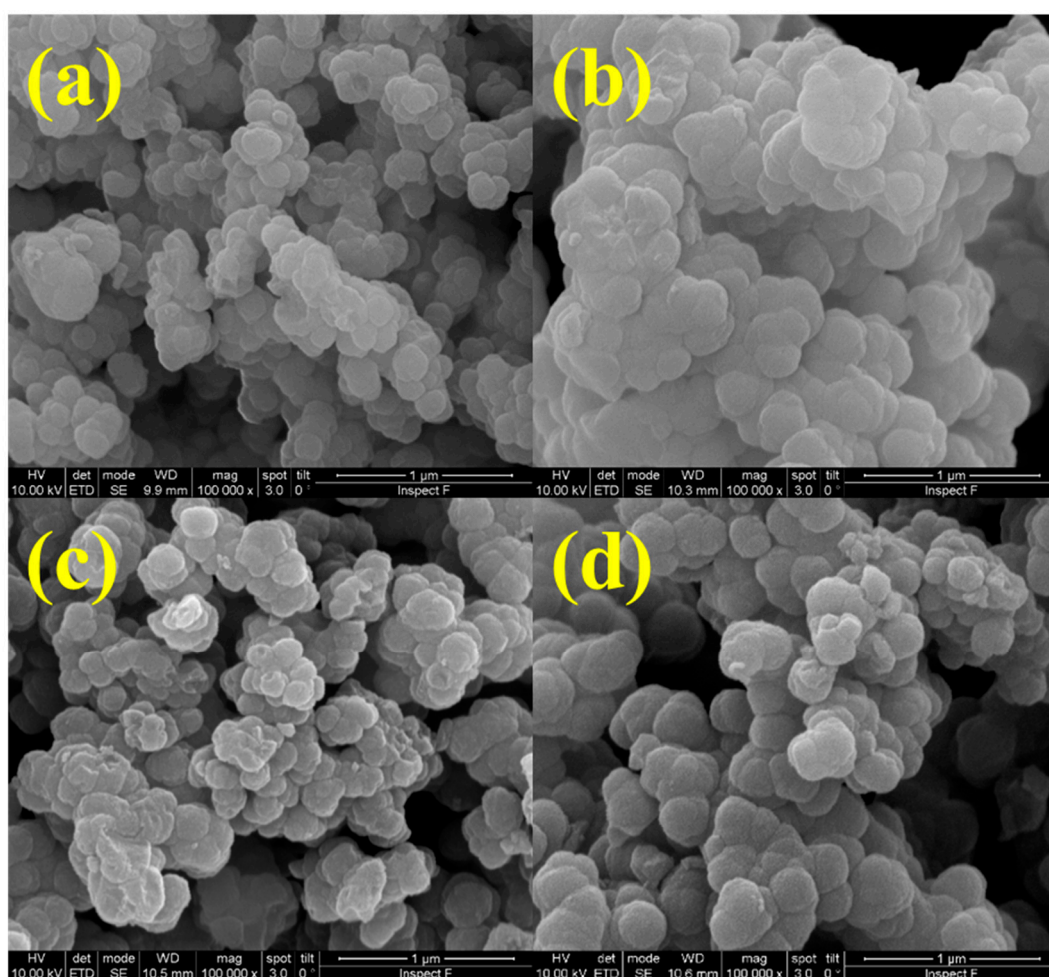

**Figure S3.** FE-SEM images of UiO-66 (a) before and (b) after adsorption, and UiO-66-NH<sub>2</sub> (c) before and (d) after adsorption.

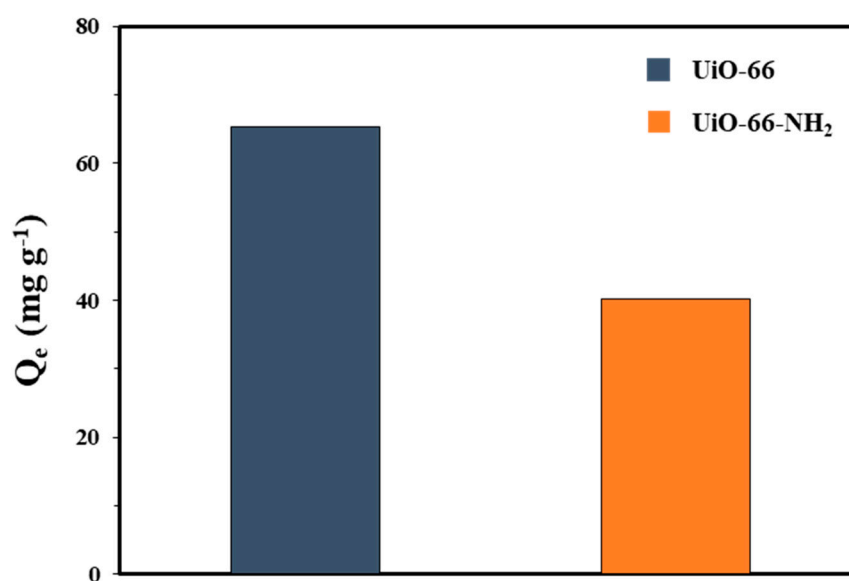

**Figure S4.** Adsorption capacity of TCs by UiO-66 and UiO-66-NH<sub>2</sub>.

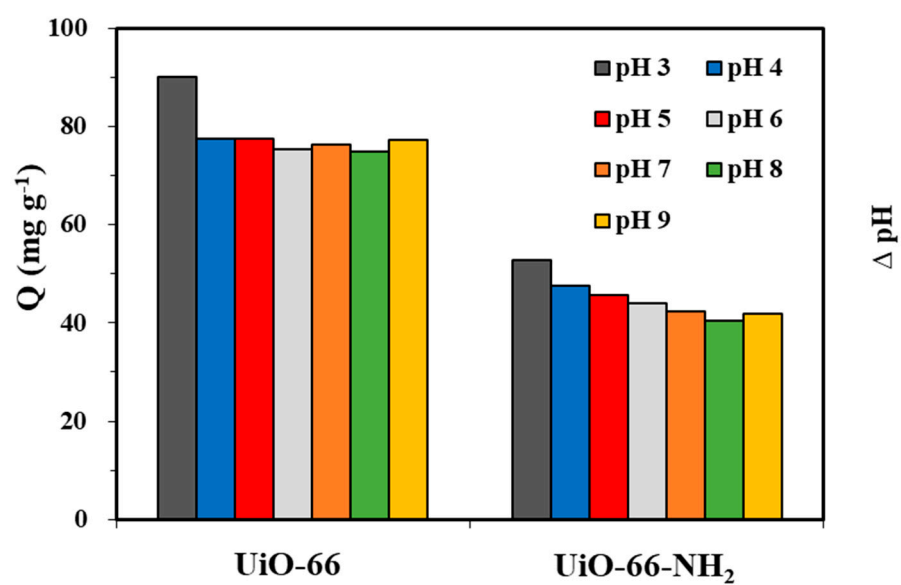

Figure S5. Effect of pH on the adsorption capacity of TCs.

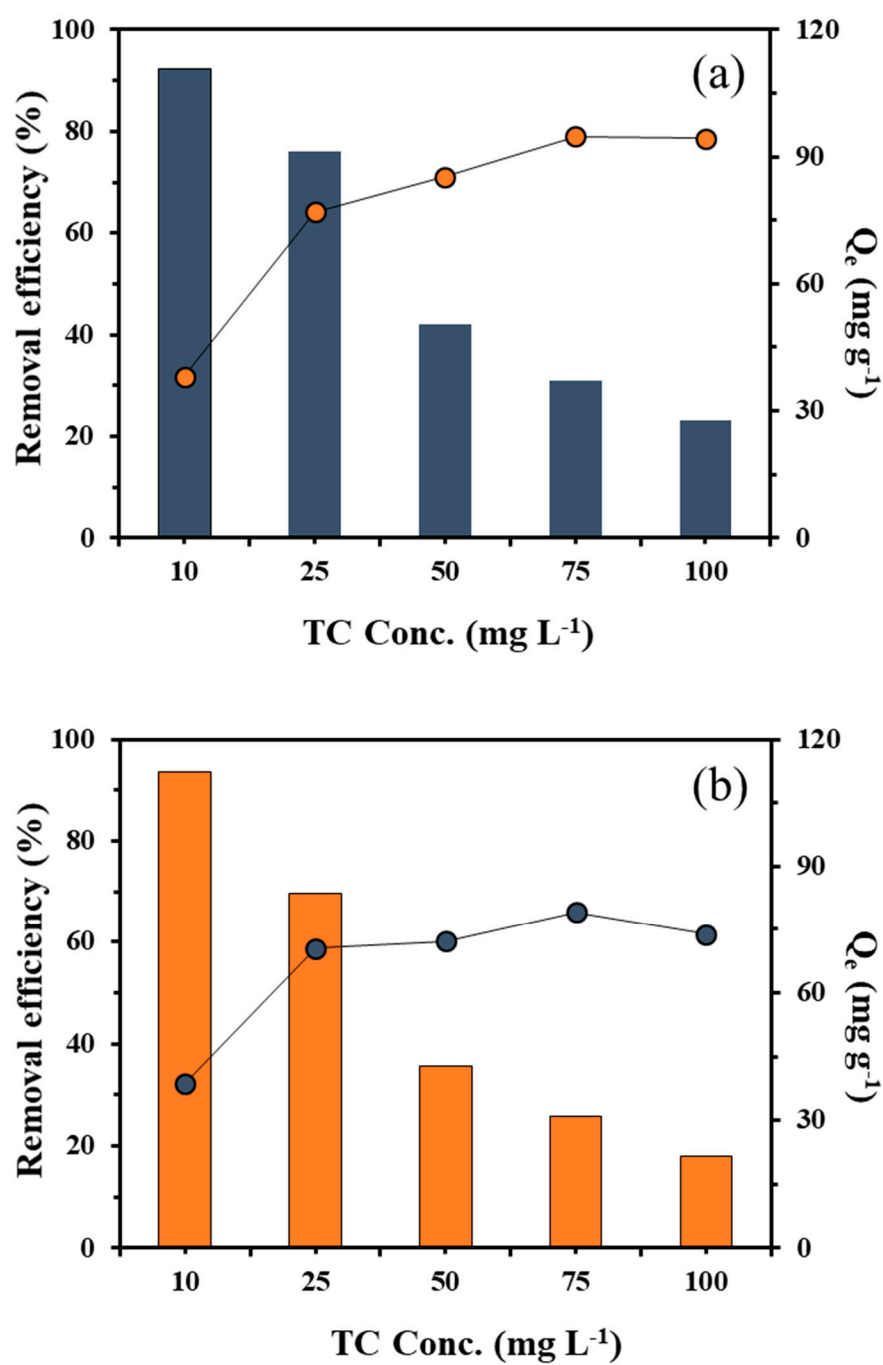

Figure S6. Effect of different initial TC concentrations on (a) UiO-66 and (b) UiO-66-NH<sub>2</sub>.

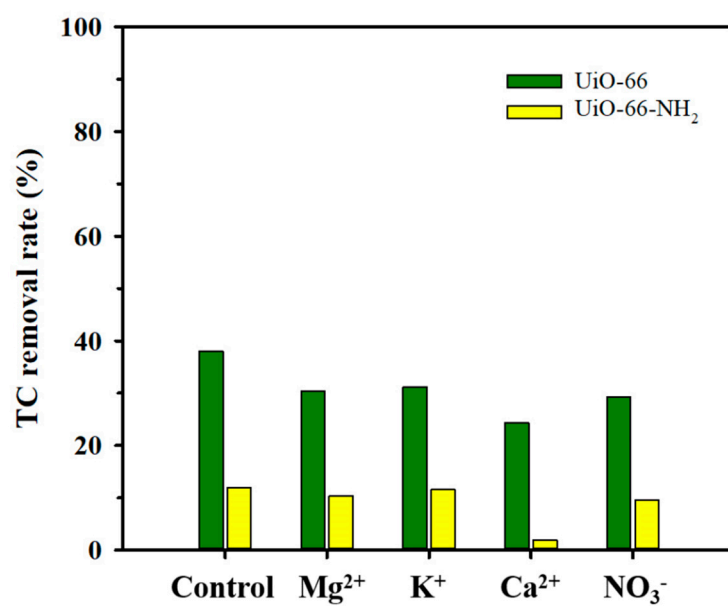

Figure S7. Comparison of the effect of ionic strength on TC adsorption at concentration condition.

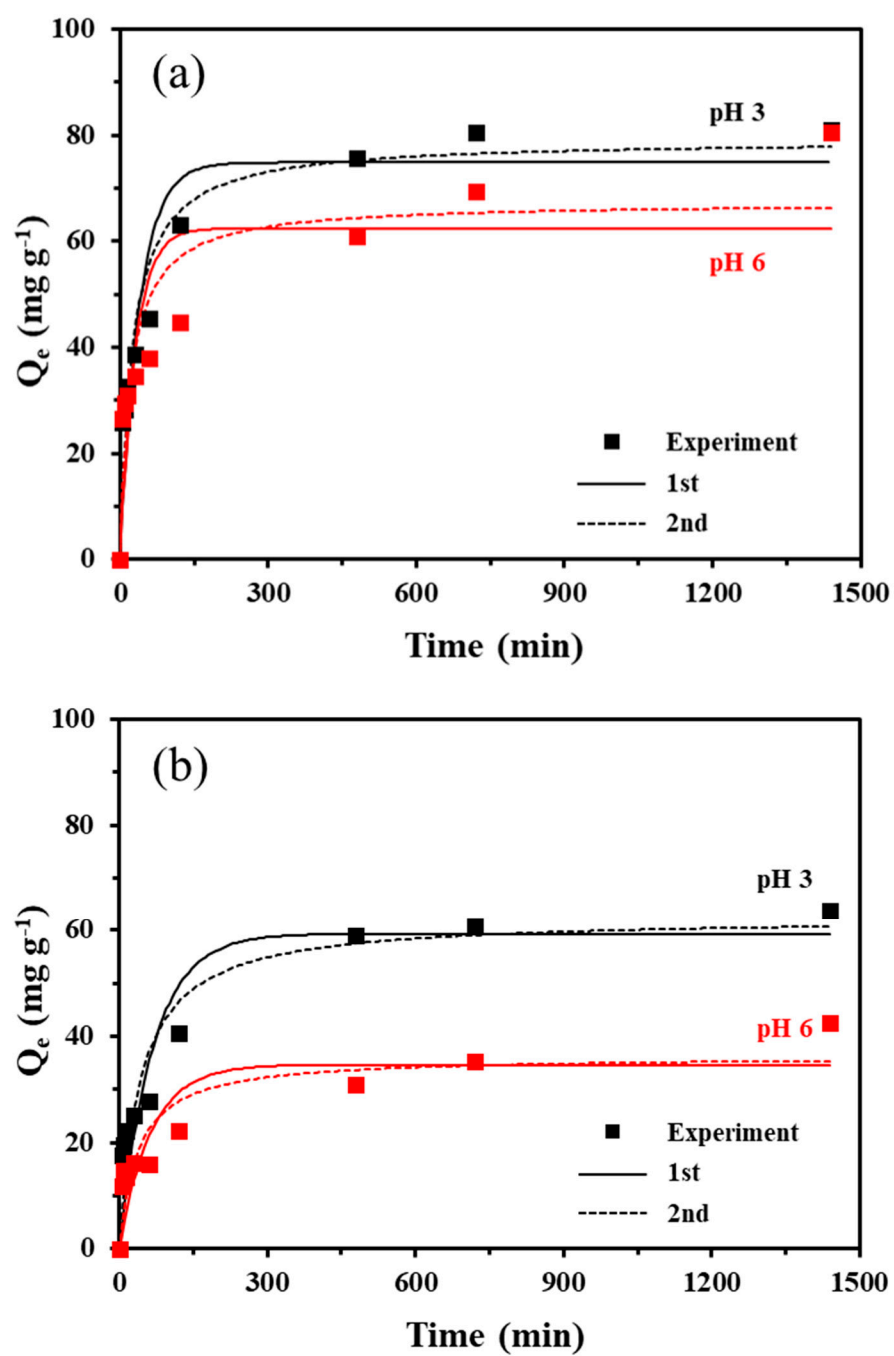

**Figure S8.** Adsorption kinetics corresponding to the pseudo-first- and pseudo-second-order models of TCs on (a) UiO-66 and (b) UiO-66-NH<sub>2</sub> at different pH values.

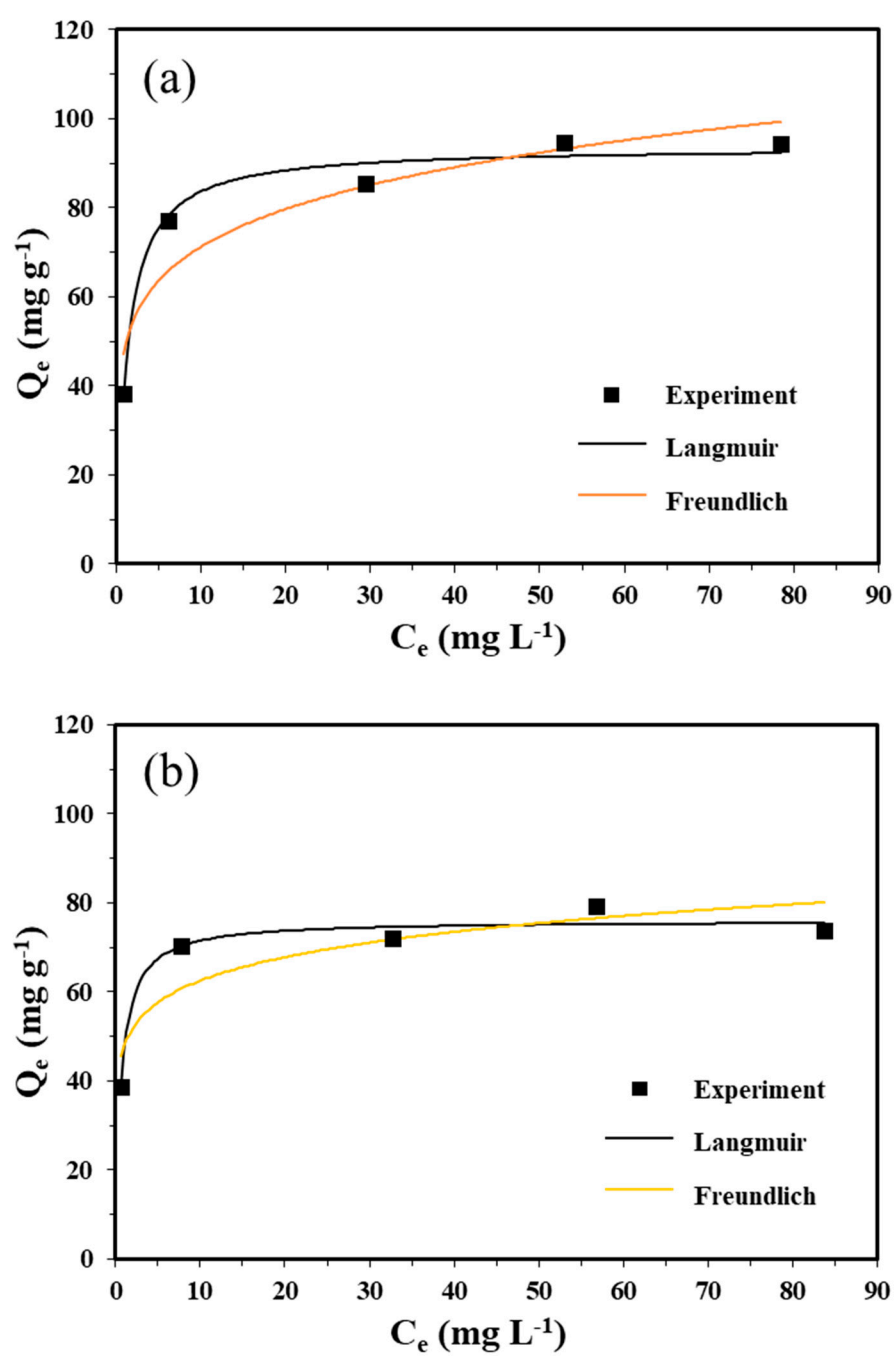

**Figure S9.** Adsorption isotherms corresponding to the Langmuir and Freundlich models of TCs on (a) UiO-66 and (b) UiO-66-NH<sub>2</sub>.



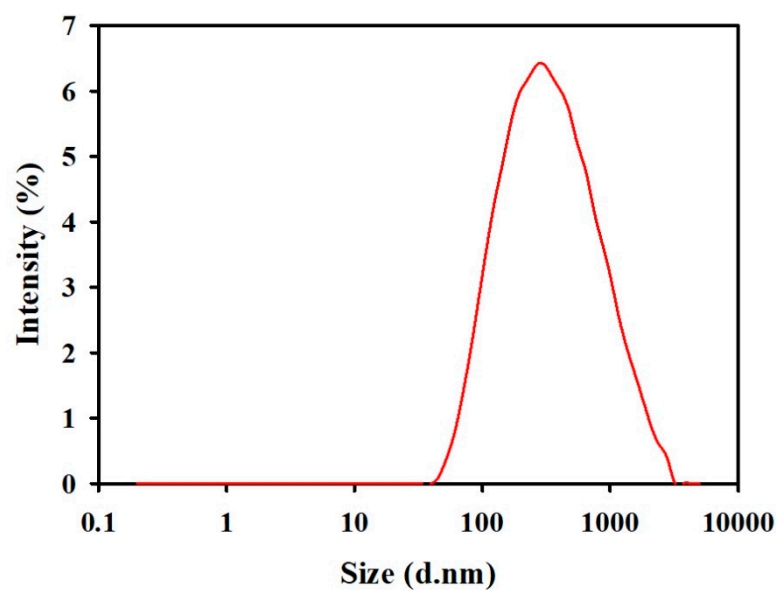

Figure S10. Particle size distribution of TC.

## Reference

- S1. C.S. Wu, Z.H. Xiong, C. Li, J.M. Zhang, Zeolitic imidazolate metal organic framework ZIF-8 with ultra-high adsorption capacity bound tetracycline in aqueous solution, RSC. Adv. 5 (2015) 82127-82137.
